# Supplementary material for: Bifidobacterium animalis subsp. lactis LPL-RH improves postoperative gastrointestinal symptoms and nutrition indexes by regulating the gut microbiota in patients with valvular heart disease: a randomized controlled trial
Source: Royal Society of Chemistry journal article supplement (doi:10.1039/d4fo01471e), 2024-01-01
Supplement: d4fo01471e1.pdf [file d4fo01471e1.pdf]

**Supplementary Table 1** Gastrointestinal symptom scores in preoperative patients.

| Gastrointestinal symptom | PB Group (n=53) | PC Group (n=52) | t/z/ $\chi^2$ | P-Value |
|--------------------------|-----------------|-----------------|---------------|---------|
| Abdominal pain           | 0.00(0.00-0.00) | 0.00(0.00-0.00) | -0.019        | 0.985   |
| Bloating                 | 0.00(0.00-0.00) | 0.00(0.00-0.75) | -0.697        | 0.486   |
| Diarrhea                 | 0.00(0.00-0.00) | 0.00(0.00-0.00) | -0.331        | 0.740   |
| Constipation             | 0.00(0.00-1.00) | 0.00(0.00-1.00) | -0.122        | 0.903   |
| Nausea                   | 0.00(0.00-0.00) | 0.00(0.00-0.00) | -0.317        | 0.751   |
| Vomiting                 | 0.00(0.00-0.00) | 0.00(0.00-0.00) | -0.028        | 0.978   |
| Total                    | 0.00(0.00-2.00) | 1.00(0.00-2.00) | -0.444        | 0.657   |

Data are presented as median (interquartile range).

**Supplementary Table 2** Preoperative and intraoperative variables of included patients.

| Variables                             | PB Group (n=53)        | PC Group (n=52)        | t/Z/ $\chi^2$ | P-Value |
|---------------------------------------|------------------------|------------------------|---------------|---------|
| NT-proBNP, ng/L                       | 586.00(230.00-2262.50) | 357.50(67.90-1486.75)  | -1.727        | 0.084   |
| WBC count, $\times 10^9/L$            | 5.76 $\pm$ 2.28        | 6.02 $\pm$ 1.58        | -0.696        | 0.488   |
| RBC count, $\times 10^{12}/L$         | 4.28 $\pm$ 0.54        | 4.35 $\pm$ 0.49        | -0.657        | 0.513   |
| Hemoglobin, g/L                       | 128.30 $\pm$ 17.75     | 131.46 $\pm$ 13.16     | -1.034        | 0.303   |
| Platelet count, $\times 10^9/L$       | 171.00(146.00-205.50)  | 193.00(153.50-247.50)  | -1.147        | 0.251   |
| Neutrophil count, $\times 10^9/L$     | 3.23(2.58-4.74)        | 3.59(2.83-4.75)        | -0.891        | 0.373   |
| Lymphocyte counts,<br>$\times 10^9/L$ | 1.46 $\pm$ 0.50        | 1.53 $\pm$ 0.52        | -0.704        | 0.483   |
| Monocyte count, $\times 10^9/L$       | 0.42(0.34-0.57)        | 0.42(0.31-0.57)        | -0.019        | 0.985   |
| AST, U/L                              | 24.40(18.49-33.70)     | 23.65(18.40-31.85)     | -0.077        | 0.939   |
| ALT, U/L                              | 22.20(12.95-31.65)     | 19.25(13.60-30.68)     | -0.022        | 0.982   |
| Cr, $\mu\text{mol}/L$                 | 77.20(63.50-88.80)     | 74.15(60.75-94.65)     | -0.067        | 0.946   |
| LVEF, %                               | 62.00(53.50-67.00)     | 62.00(58.25-67.00)     | -0.167        | 0.867   |
| Left atrial diameter, mm              | 46.00(41.00-51.50)     | 43.50(38.00-49.75)     | -1.113        | 0.266   |
| Right atrial diameter, mm             | 36.00(31.00-42.50)     | 36.50(33.25-41.00)     | -0.424        | 0.672   |
| Ascending aortic<br>diameter, mm      | 31.00(29.00-34.50)     | 32.00(28.00-38.00)     | -0.880        | 0.379   |
| Aortic cross-clamp time,<br>min       | 57.00(51.50-80.00)     | 71.00(57.25-88.50)     | -1.481        | 0.139   |
| Surgical methods, n (%)               |                        |                        | 5.764         | 0.330   |
| MVR+TVP                               | 28 (52.8%)             | 20 (38.5%)             |               |         |
| MVR+TVP+AVR                           | 9 (17.0%)              | 10 (19.2%)             |               |         |
| AVR                                   | 10 (18.9%)             | 13 (25.0%)             |               |         |
| MVR                                   | 2 (3.8%)               | 7 (13.5%)              |               |         |
| MVP                                   | 3 (5.7%)               | 1 (1.9%)               |               |         |
| MVR+AVR                               | 1 (1.9%)               | 1 (1.9)                |               |         |
| Intraoperative bleeding<br>volume, ml | 600.00 (500.00-800.00) | 600.00 (500.00-800.00) | -0.483        | 0.629   |

Data are presented as n (%), mean  $\pm$  standard deviation or median (interquartile range). Abbreviations: NT-proBNP, N-terminal pro-B-type natriuretic peptide; WBC, white blood cell; RBC, red blood cell; AST, aspartate aminotransferase; ALT, alanine aminotransferase; Cr, creatinine; LVEF, left ventricular ejection fraction; MVR, mitral valve replacement; MVP, mitral valve repair; TVP, tricuspid valve plasty; AVR, aortic valve replacement.

**Supplementary Table 3 Gastrointestinal symptom score and Time to recovery of bowel function after surgery.**

| <b>Gastrointestinal symptom</b>              | <b>PB Group (n=53)</b> | <b>PC Group (n=52)</b> | <b>t/Z/χ<sup>2</sup></b> | <b>P-Value</b> |
|----------------------------------------------|------------------------|------------------------|--------------------------|----------------|
| <b>Abdominal pain</b>                        | 0.00 (0.00-0.00)       | 1.00 (0.00-1.00)       | -3.445                   | 0.001          |
| <b>Bloating</b>                              | 1.00 (0.00-1.00)       | 1.00 (0.00-2.00)       | -2.358                   | 0.018          |
| <b>Diarrhea</b>                              | 0.00 (0.00-0.00)       | 0.00 (0.00-0.00)       | -1.043                   | 0.297          |
| <b>Constipation</b>                          | 1.00 (0.00-1.50)       | 1.00 (0.00-2.00)       | -2.285                   | 0.022          |
| <b>Nausea</b>                                | 0.00 (0.00-1.00)       | 0.00 (0.00-1.75)       | -0.892                   | 0.372          |
| <b>Vomiting</b>                              | 0.00 (0.00-1.00)       | 0.00 (0.00-1.00)       | -0.690                   | 0.490          |
| <b>Total</b>                                 | 2.00 (0.50-4.00)       | 4.50 (1.25-7.00)       | -2.859                   | 0.004          |
| <b>Time to recovery of bowel function, d</b> | 4.00 (3.00-5.00)       | 4.50 (4.00-5.00)       | -2.382                   | 0.017          |
| <b>Antiemetics use, n (%)</b>                | 21(39.6)               | 21(40.4)               | 0.006                    | 0.936          |
| <b>Antidiarrheal use, n (%)</b>              | 4(7.5)                 | 5(9.6)                 | 0.001                    | 0.976          |
| <b>cathartics use, n (%)</b>                 | 14(26.4)               | 11(21.6)               | 0.334                    | 0.563          |

Data are presented as n (%), median (interquartile range).

**Supplementary Table 4** Postoperative adverse events in included patients.

| Variables                    | PB Group (n=53) | PC Group (n=52) | t/z/ $\chi^2$ | P-Value |
|------------------------------|-----------------|-----------------|---------------|---------|
| Hemorrhage, n (%)            | 1(1.9)          | 1(1.9)          | 0.000         | 1.000   |
| Repeated thoracotomy, n (%)  | 1(1.9)          | 1(1.9)          | 0.000         | 1.000   |
| Renal insufficiency, n (%)   | 10(18.9)        | 8(15.4)         | 0.224         | 0.636   |
| Hepatic insufficiency, n (%) | 6(11.3)         | 3(5.8)          | 0.445         | 0.505   |
| Fever, n (%)                 | 17(32.1)        | 22(42.3)        | 1.177         | 0.278   |

Data are presented as n (%)

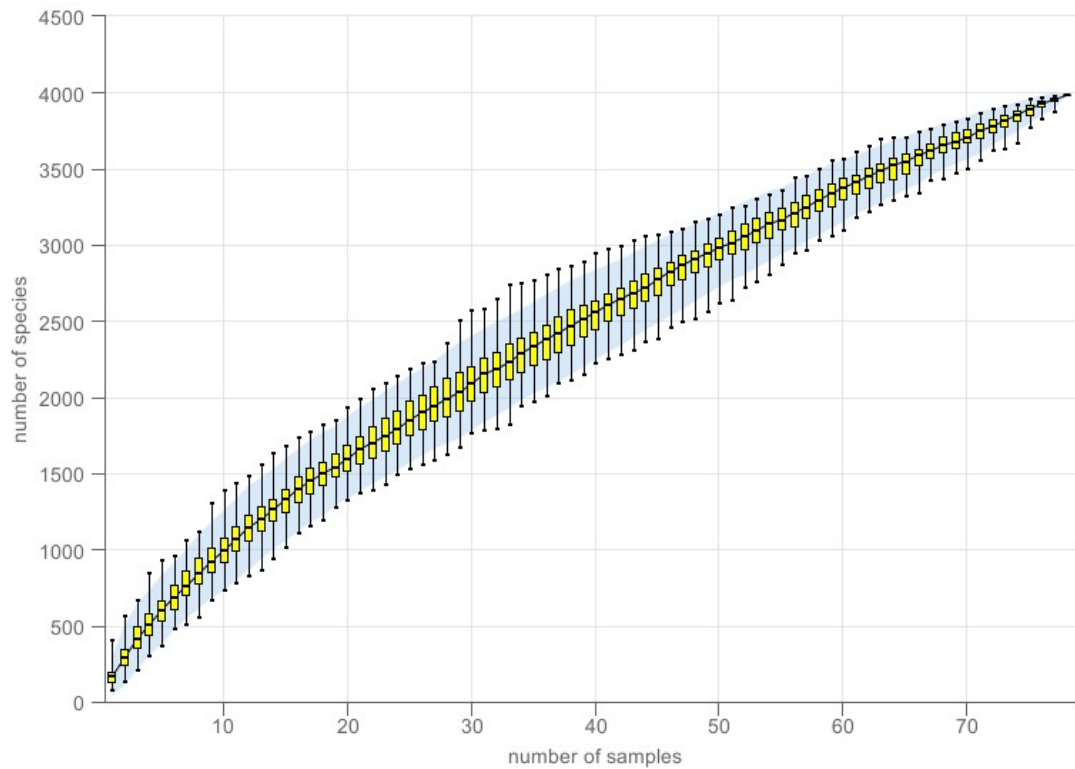

Supplementary Fig. 1 The species accumulation curves.
